# Supplementary material for: Carotid Artery End-Diastolic Velocity and Future Cerebro-Cardiovascular Events in Asymptomatic High Risk Patients
Source: PubMed Central journal article supplement — Korean Circ J. 2016 Jan 14;46(1):72–8. doi: 10.4070/kcj.2016.46.1.72 (PMC4720852; doi:10.4070/kcj.2016.46.1.72), 2016-01-14
Supplement: kcj-46-72-s001.pdf [file kcj-46-72-s001.pdf]

**Supplementary Table.** Predictive value of CCA-EDV for composite cardiovascular events, in which cerebrovascular events were excluded

|            | <b>HR</b> | <b>95% CI</b> | <b>p</b> |
|------------|-----------|---------------|----------|
| Univariate | 0.91      | 0.87-0.96     | <0.001   |
| Model 1    | 0.95      | 0.90-0.996    | 0.033    |
| Model 2    | 0.95      | 0.90-0.996    | 0.036    |
| Model 3    | 0.95      | 0.91-1.001    | 0.054    |
| Model 4    | 0.95      | 0.90-1.002    | 0.062    |

Model 1 included CCA-EDV, age and sex (demographics); Model 2 included history of hypertension, diabetes, and smoking status (risk factors) in addition to Model 1 variables; Model 3 included aspirin use and statin use (medications) in addition to Model 2 variables; and Model 4 included IMT and presence of plaque (imaging markers) in addition to Model 3 variables. In all the models, CCA-EDV was included. CCA: common carotid artery, EDV: end-diastolic velocity, HR: hazard ratio, CI: confidence interval
